# Supplementary material for: Al-free Zr-zeolite beta as a regioselective catalyst in the Meerwein–Ponndorf–Verley reaction
Source: Royal Society of Chemistry journal article supplement (doi:10.1039/b309191k), 2003-01-01

Al-Free Zr-Zeolite Beta as a Regioselective Catalyst in the Meerwein-Ponndorf-Verley Reaction

Yongzhong Zhu, Gaikhuan Chuah and Stephan Jaenicke*

Department of Chemistry, National University of Singapore,Kent Ridge, Singapore 119260, Singapore. Fax: 65 6779 1691; Tel: 65 6874 2918; E-mail: chmsj@nus.edu.sg

**29Si MAS NMR**

29Si MAS NMR spectra were recorded on a Bruker DRX-400 spectrometer at a 29Si frequency of 79.46 MHz with a spinning rate of 12kHz and a recycle time of 20 s. The 29Si chemical shifts are reported relative to TMS.

| Sample | Si/Zr |
| --- | --- |
| Si-beta | - |
| Zr75 | 84 |
| Zr100 | 107 |
| Zr200 | 194 |


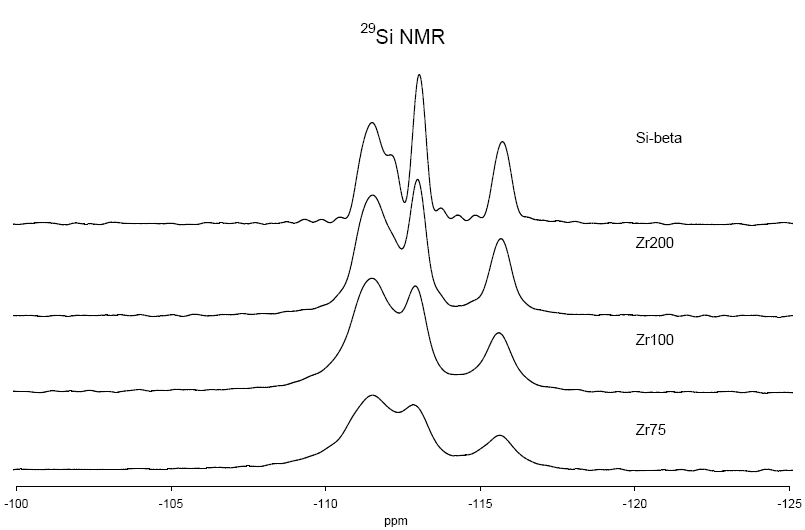

Supplement: b309191k.doc [file b309191k.doc]
